# Supplementary material
Source: PubMed Central journal article supplement (PMC7007836)
Supplement: NIHMS1541466-supplement-2.pdf [file NIHMS1541466-supplement-2.pdf]

Supplementary Figure 2

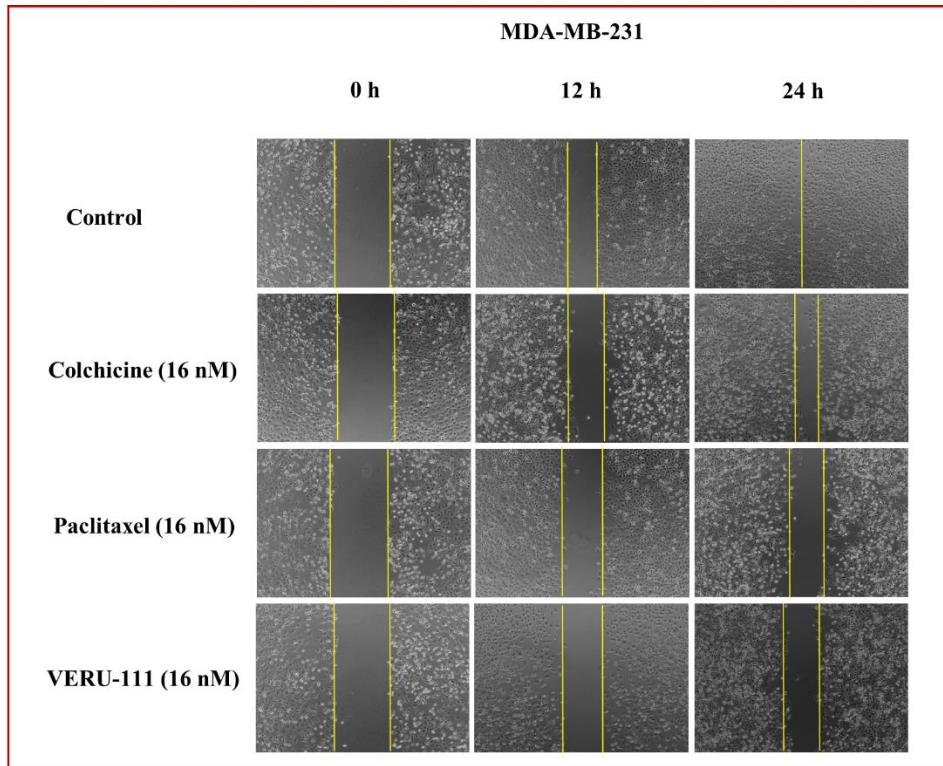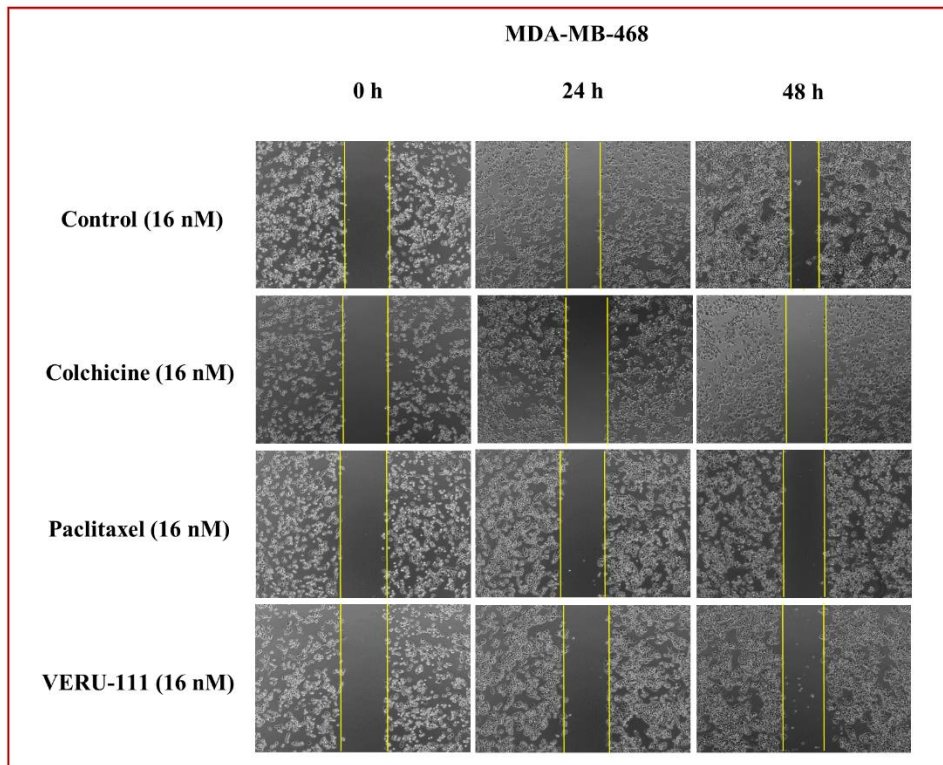

**Supplementary Figure S2.** Images of the effects of VERU-111, paclitaxel and colchicine on inhibition of TNBC cell wound healing at a concentration of 16 nM. Representative images show that VERU-111 inhibits wound closure in MDA-MB-231 (upper panel) and MDA-MB-468 cells (lower panel).
