# Supplementary material
Source: PubMed Central journal article supplement (PMC7007836)
Supplement: NIHMS1541466-supplement-3.pdf [file NIHMS1541466-supplement-3.pdf]

Supplementary Figure 3

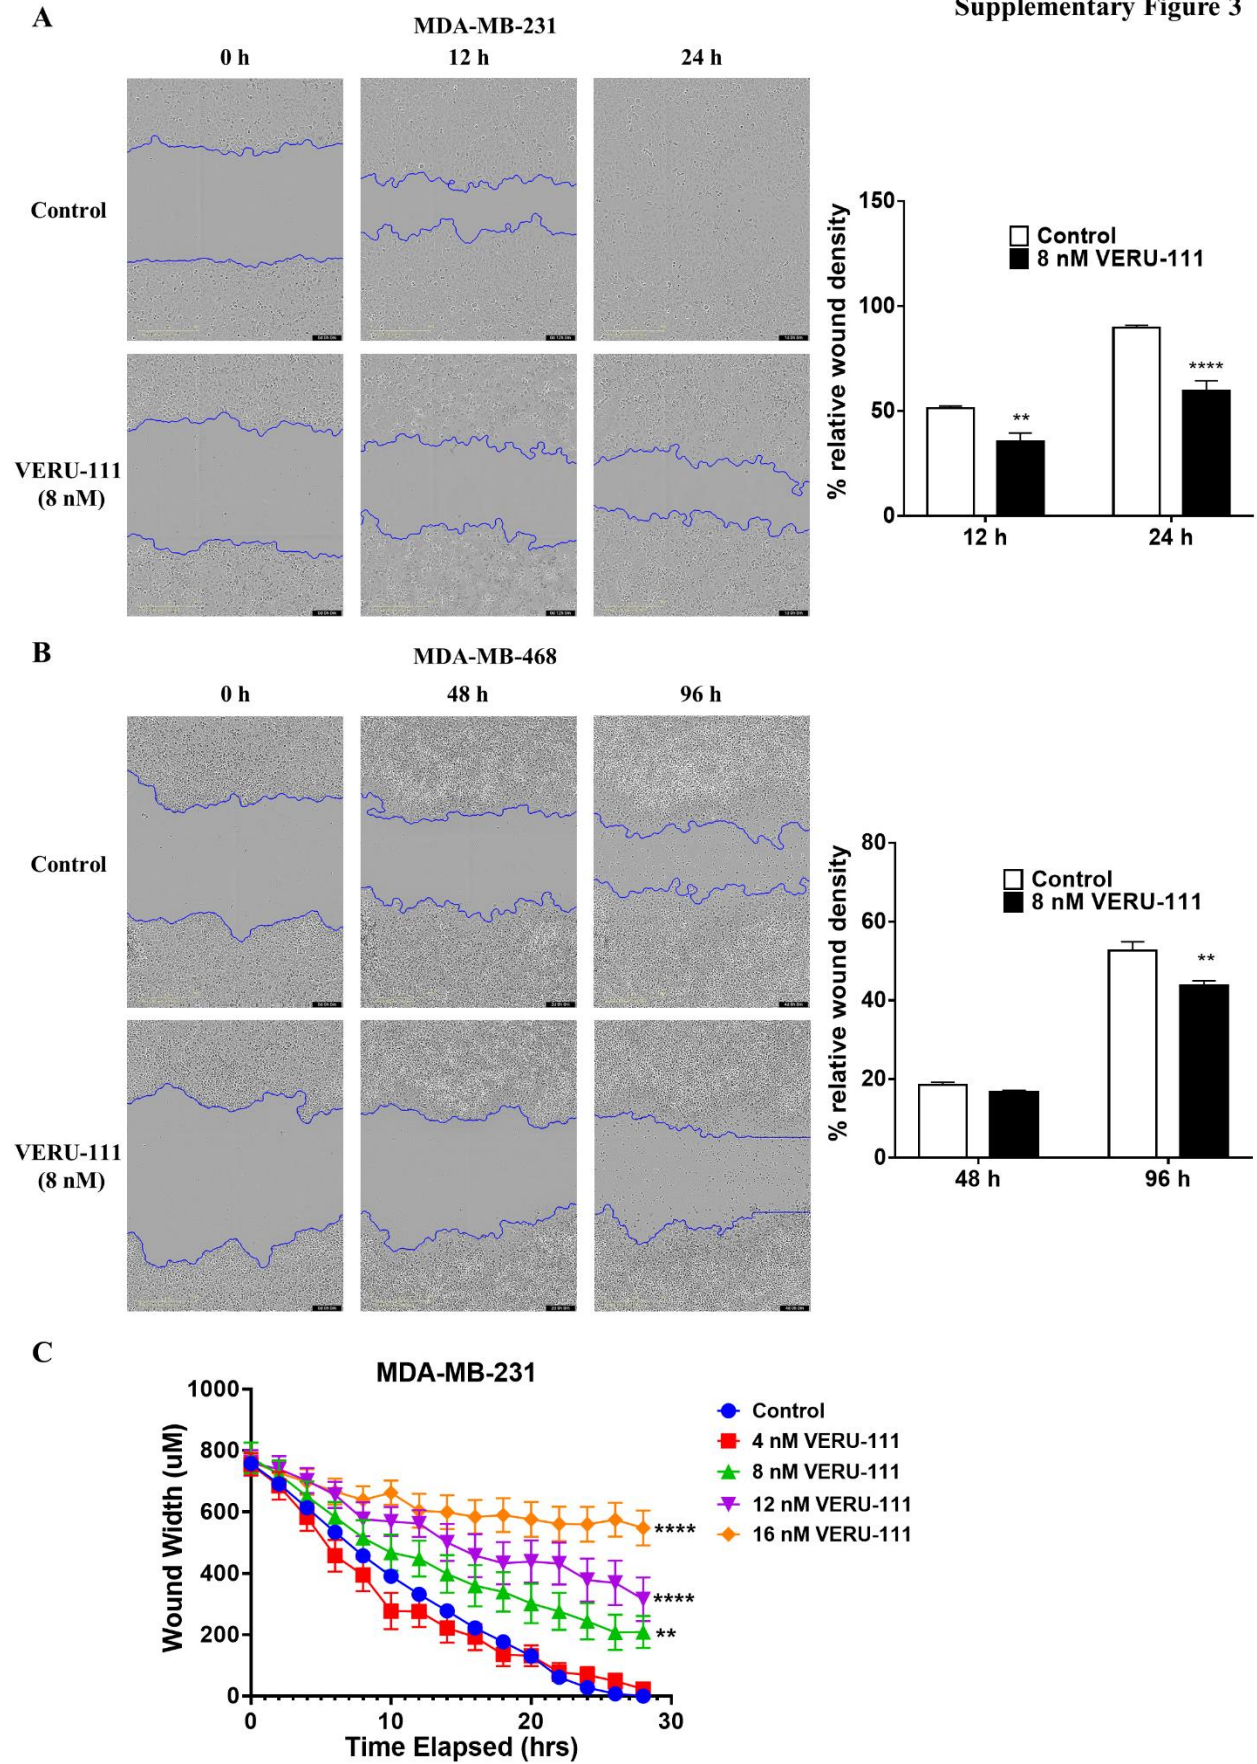

**Supplementary Figure S3.** The  $IC_{50}$  dose of VERU-111 inhibits wound healing of TNBC cells in a scratch wound healing assay. The scratch assay was repeated in MDA-MB-231 and MDA-MB-468 cells at 8 nM concentration. (A) Representative images of MDA-MB-231 cells treated with 8 nM of VERU-111 at 12h and 24h post-scratch as compared to untreated cells. (B) Representative images of MDA-MB-468 cells treated with 8 nM of VERU-111 at 48h and 96h post-scratch as compared to untreated cells. Blue lines indicate the wound edges and the bar graphs show the percent relative wound density (wound fill-in) at each time point. (C) The concentration-dependent effect of VERU-111 on MDA-MB-231 cell wound healing over time was measured following wounding with the WoundMaker tool using the IncuCyte S3 live cell imager. Data were collected every 2 h and analyzed using the cell migration algorithm. Exposure to 8, 12 or 16 nM of VERU-111 inhibits the migration of MDA-MB-231 cells in a concentration-dependent manner. All data are presented as the grand mean  $\pm$  SEM of three independent experiments.
