# Supplementary material
Source: PubMed Central journal article supplement (PMC7007836)
Supplement: NIHMS1541466-supplement-4.pdf [file NIHMS1541466-supplement-4.pdf]

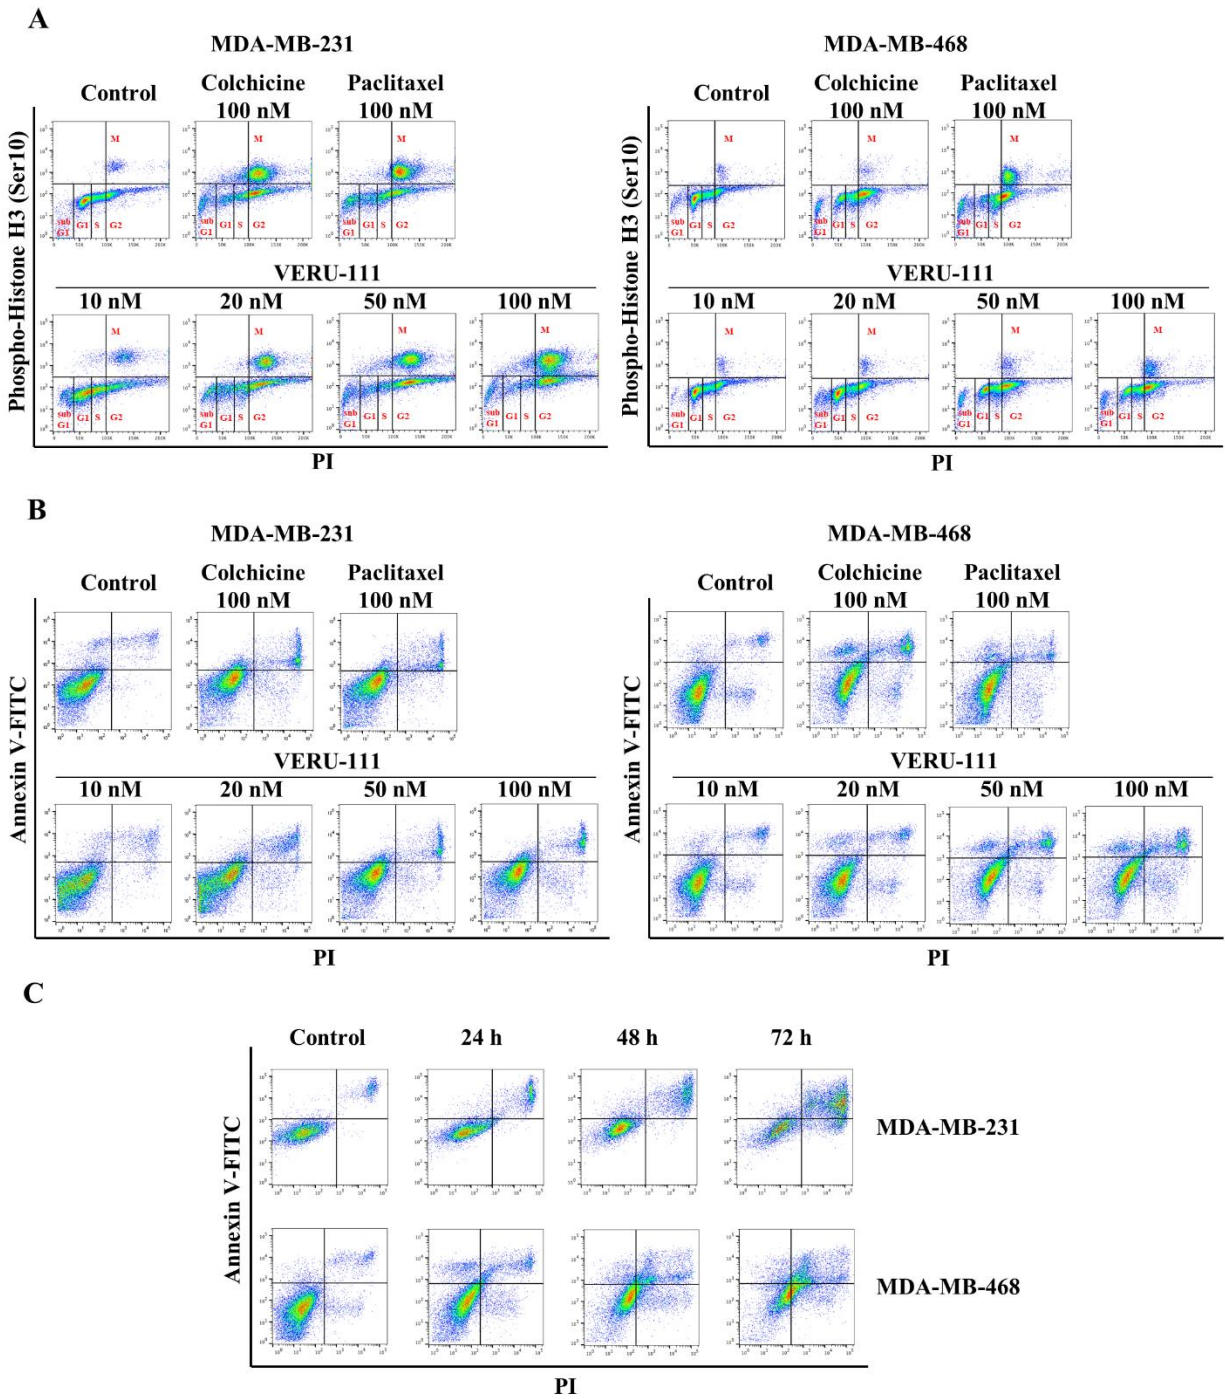

**Supplementary Figure S4.** FACS analysis profiles of MDA-MB-231 and MDA-MB-468 TNBC cells following treatment with vehicle (Control), colchicine or paclitaxel, showing VERU-111 induces G2/M checkpoint arrest and apoptosis in TNBC cells. (A) Representative cell cycle distribution images after VERU-111 (10, 20, 50 and 100 nM), colchicine (100 nM) and paclitaxel (100 nM) treatment. Cells were treated for 24 h and stained with anti-phospho-histone H3 (Ser10) and propidium iodide (PI). (B) Representative FACS analysis profiles of apoptotic TNBC cells after 24 h treatment with VERU-111, colchicine or paclitaxel as detected by Annexin-V-FITC/PI staining. (C) Representative FACS analysis profiles of apoptotic TNBC cells after treating with 100 nM VERU-111 for 24, 48 or 72 h, cells were stained with Annexin-V-FITC and PI.
