# Supplementary material
Source: PubMed Central journal article supplement (PMC7007836)
Supplement: NIHMS1541466-supplement-6.pdf [file NIHMS1541466-supplement-6.pdf]

Supplementary Figure 6

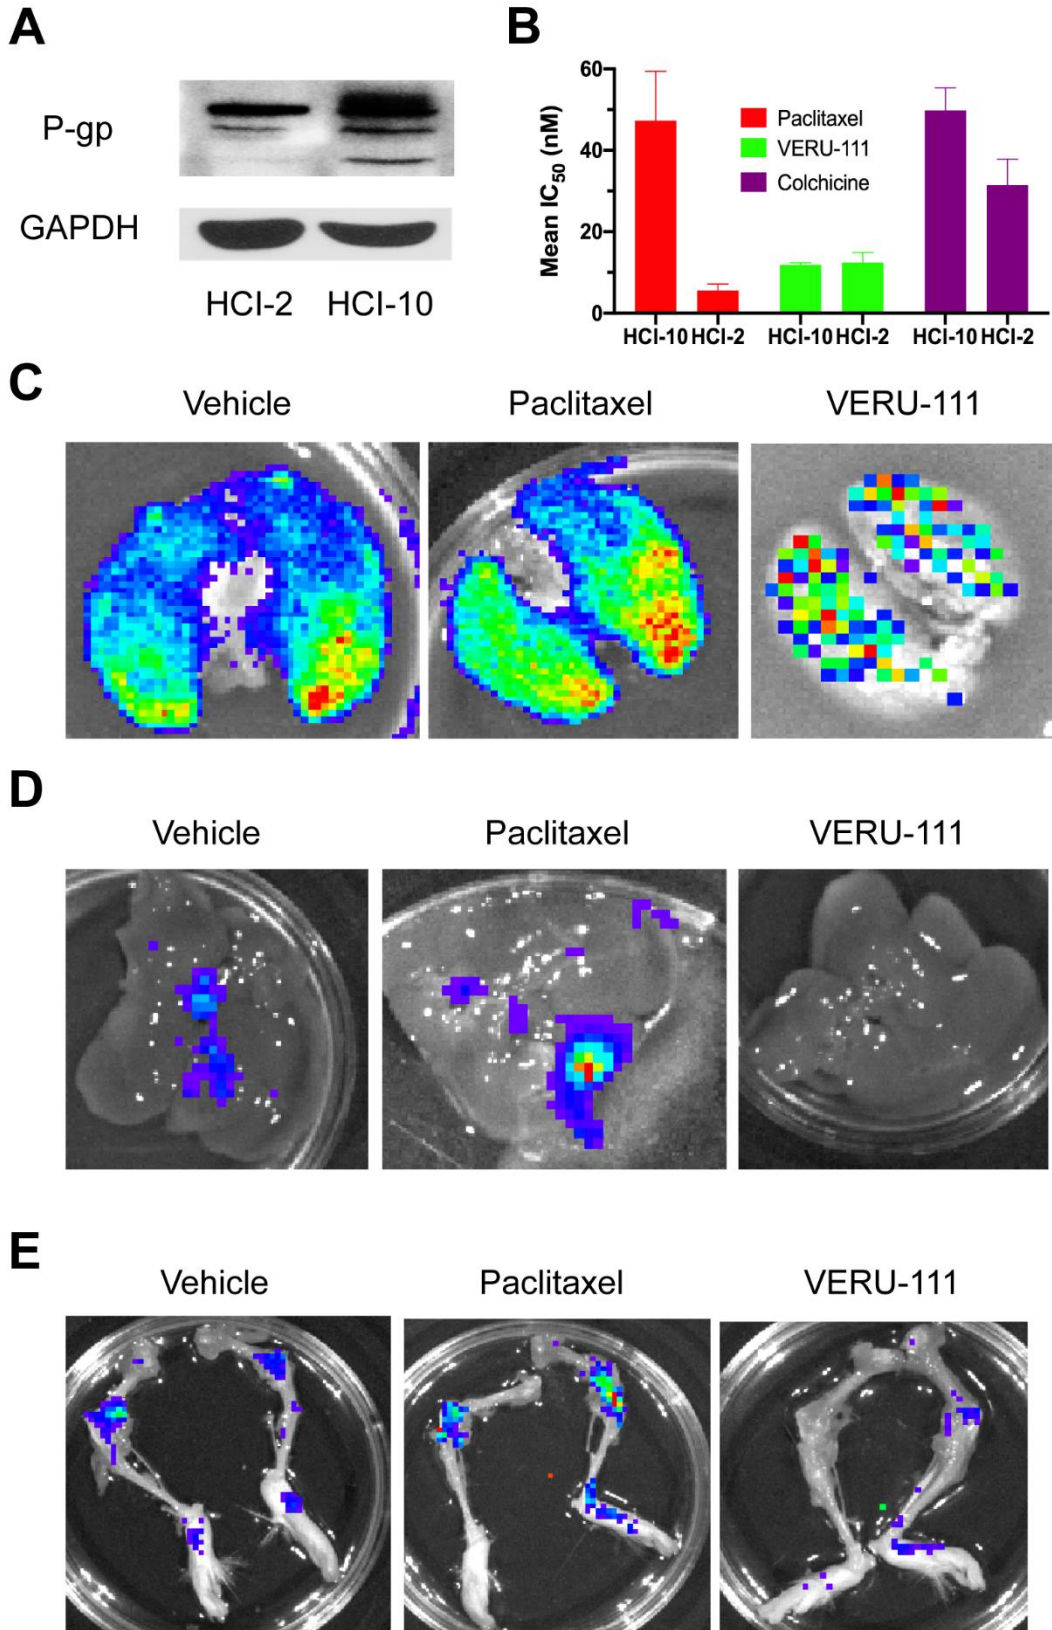

**Supplementary Figure S6.** P-gp protein levels of HCI-2-Luc2 and HCI-10-Luc2 patient-derived primary cells and representative endpoint *ex vivo* bio-imaging data obtained using the taxane-resistant HCI-10-Luc2 patient-derived reporter-labeled xenograft model. (A) P-gp expression in HCI-2 and HCI-10 cells was determined by western blotting. (B) The growth inhibitory effect of colchicine, paclitaxel and VERU-111 was measured *in vitro* by the IncuCyte S3 live cell imaging system. IC<sub>50</sub> values were calculated based on changes in density as measured by phase contrast at study endpoint relative to initial plating density. The bar graphs represent the grand mean  $\pm$  SEM of the calculated IC<sub>50</sub> values from at least 3 independent experiments. (C-E) Images representative of the mean total photon flux per treatment cohort as determined by *ex vivo* bio-imaging for the lungs (C), liver (D) and leg bones (E).
